# Supplementary material for: Specific high-resolution scheme to improve understanding of the spatio-temporal dispersion of lymphogranuloma venereum epidemic
Source: Frontiers journal article supplement (doi:10.3389/fmicb.2022.1056216), 2022-12-20
Supplement: Table_1.docx [file Table_1.docx]

1. **PCR conditions used for amplification of the selected genes**

| **Region** | **Step** | **Temperature** | **Time** | **Cycles** |
| --- | --- | --- | --- | --- |
| CTLon_0054 | Activation and initial denaturation | 94ºC | 12 min | 1 |
| Denaturation | 94ºC | 1 min | 40 |
| Annealing | 54ºC | 1 min |
| Elongation | 72ºC | 1 min |
| Final elongation | 72ºC | 10 min | 1 |
| CTLon_0087 | Activation and initial denaturation | 94ºC | 12 min | 1 |
| Denaturation | 94ºC | 1 min | 40 |
| Annealing | 58ºC | 1 min |
| Elongation | 72ºC | 1 min |
| Final elongation | 72ºC | 10 min | 1 |
| CTLon_0243 | Activation and initial denaturation | 94ºC | 12 min | 1 |
| Denaturation | 94ºC | 1 min | 40 |
| Annealing | 57ºC | 1 min |
| Elongation | 72ºC | 1 min 15 sec |
| Final elongation | 72ºC | 10 min | 1 |
| CTLon_0301 | Activation and initial denaturation | 94ºC | 12 min | 1 |
| Denaturation | 94ºC | 1 min | 40 |
| Annealing | 54ºC | 1 min |
| Elongation | 72ºC | 1 min 30 sec |
| Final elongation | 72ºC | 10 min | 1 |
| *ompA* | Activation and initial denaturation | 94ºC | 12 min | 1 |
| Denaturation | 94ºC | 1 min | 40 |
| Annealing | 58ºC | 1 min |
| Elongation | 72ºC | 1 min |
| Final elongation | 72ºC | 10 min | 1 |
